# Supplementary material for: Potassium doping-induced variations in the structures and photoelectric properties of a MAPbI3 perovskite and a MAPbI3/TiO2 junction
Source: Royal Society of Chemistry journal article supplement (doi:10.1039/d0cp03630g), 2020-01-01
Supplement: d0cp03630g1.pdf [file d0cp03630g1.pdf]

## Supporting Information - Potassium Doping-induced Variations on Geometric and Photoelectric Properties of MAPbI<sub>3</sub> Perovskite and MAPbI<sub>3</sub>/TiO<sub>2</sub> Junction<sup>†</sup>

Qi Liu,<sup>a,†</sup> Ming-Gang Ju<sup>b</sup> and WanZhen Liang<sup>a,\*</sup>

p

---

<sup>a</sup> State Key Laboratory of Physical Chemistry of Solid Surfaces, Collaborative Innovation Center of Chemistry for Energy Materials, Fujian Provincial Key Laboratory of Theoretical and Computational Chemistry, and Department of Chemistry, College of Chemistry and Chemical Engineering, Xiamen University, Xiamen, Fujian 361005, People's Republic of China Email:liangwz@xmu.edu.cn

<sup>b</sup> School of Physics, Southeast University, Nanjing, Jiangsu, People's Republic of China.

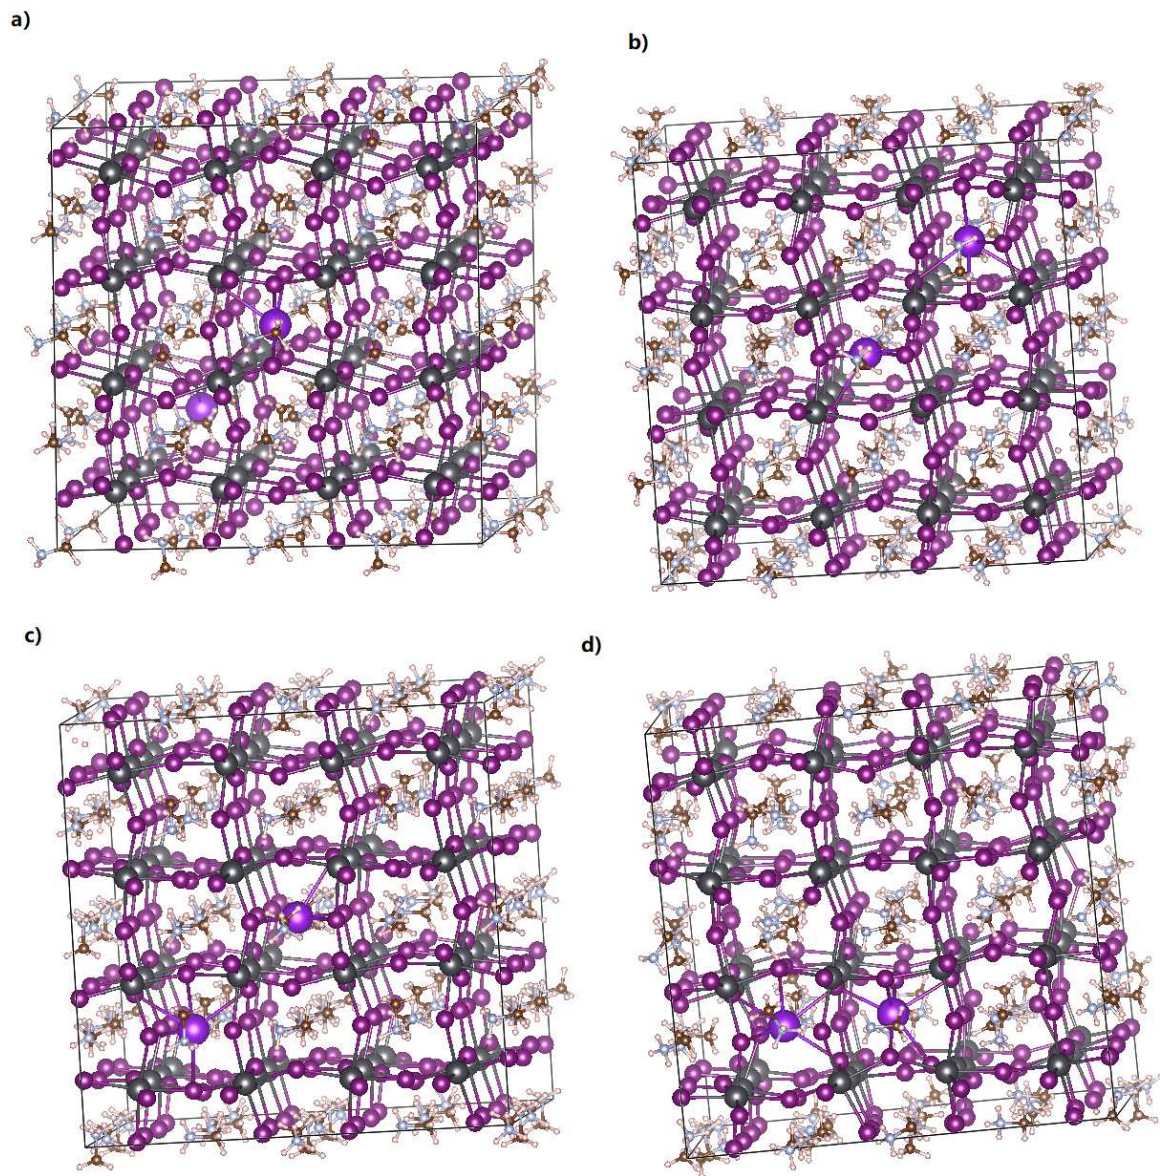

**Fig.S 1** Optimized structures of SD-MAPbI<sub>3</sub> slabs: a) two K<sup>+</sup> located well separately (isolated), b) common-vertexed (vertical), c) common-edged (coplanar) and d) directly face-to-face adjacent

**Table 1** Band gaps and conduction band offsets (in eV) for bulk MAPbI<sub>3</sub>, TiO<sub>2</sub> and the junction with K<sup>+</sup> doped inside perovskite layers

| Dopants               | $E_{cb, don.}$ | $E_{cb, acc.}$ | $\Delta V_{mix}$ | $E_{cb} - V_{don.}$ | $E_{cb} - V_{acc.}$ | Band Offset |
|-----------------------|----------------|----------------|------------------|---------------------|---------------------|-------------|
| Inside K <sup>+</sup> | 0.932          | 0.763          | 8.096            | 11.621              | 19.476              | 0.242       |

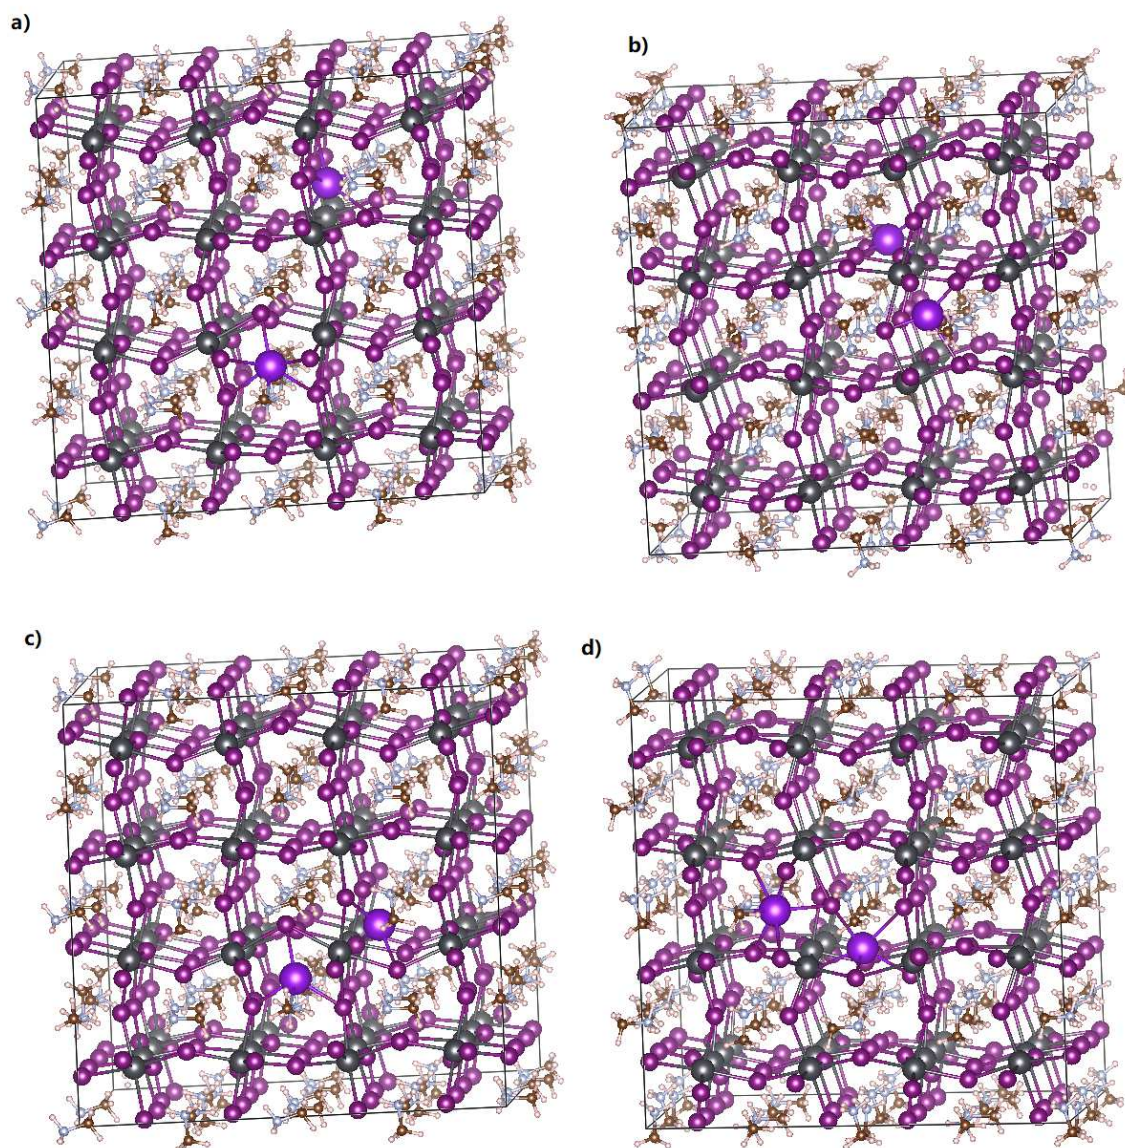

**Fig.S 2** Optimized structures of ID-MAPbI<sub>3</sub> slabs: a) two K<sup>+</sup> located well separately (isolated), b) common-vertexed (vertical), c) common-edged (coplanar) and d) directly face-to-face adjacent

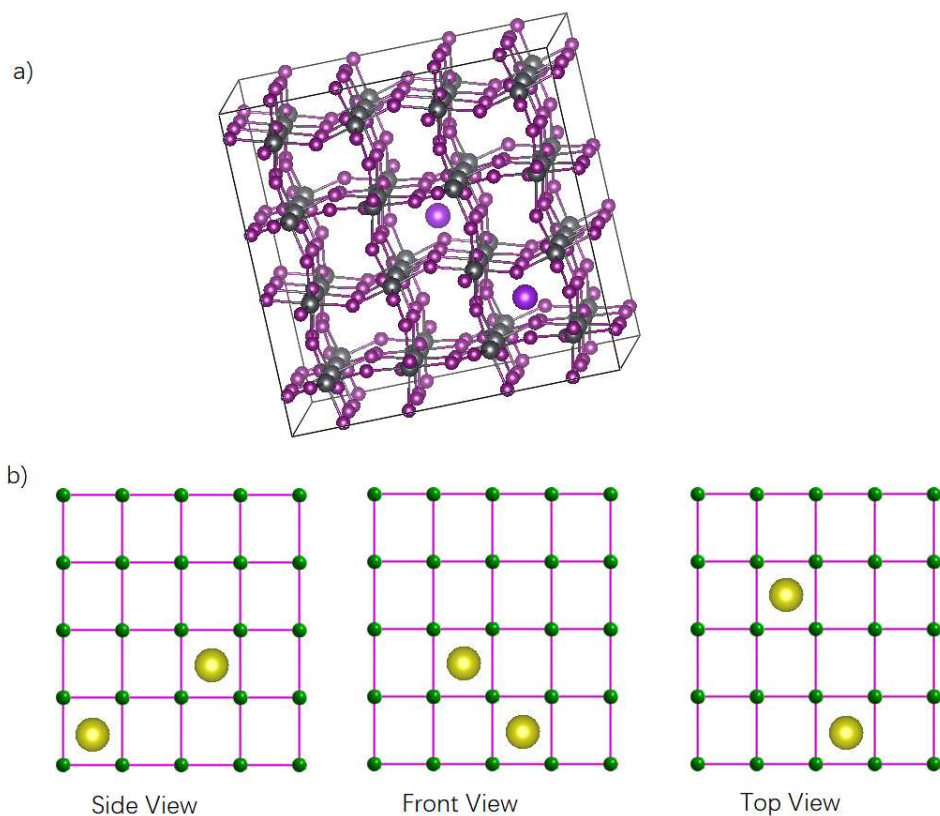

**Fig.S 3** The *a*) topological structure and its *b*) three views that make two  $K^+$  doped Pb-I cube neither adjacent directly nor coplanar.

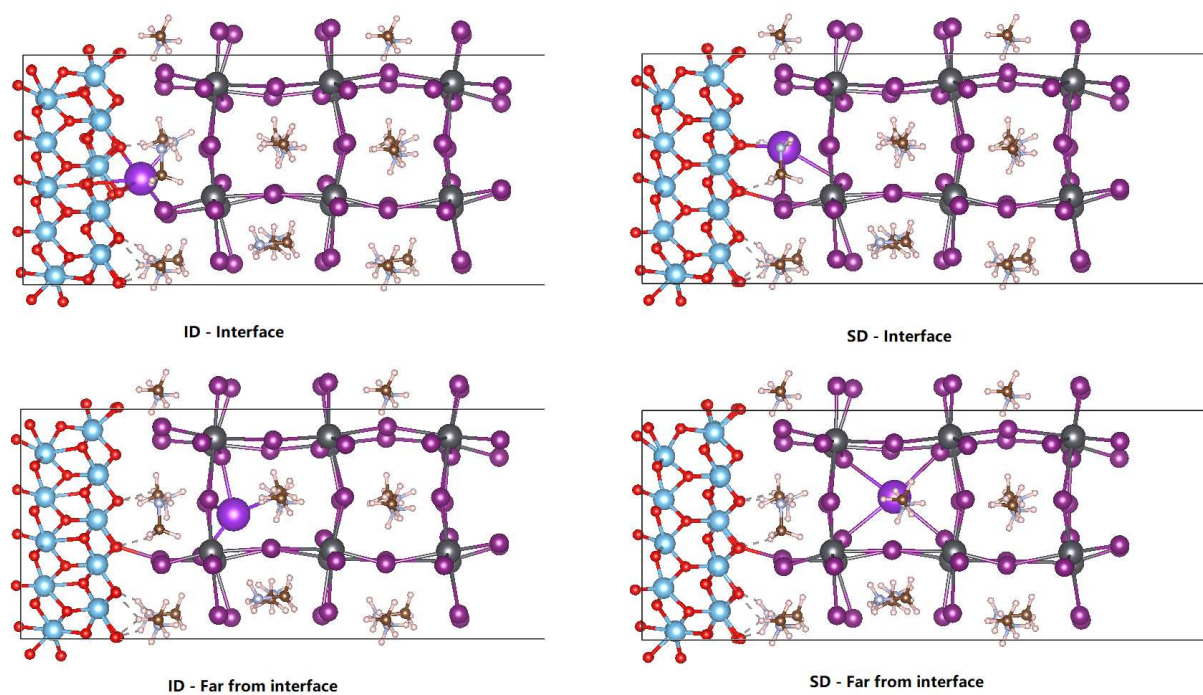

**Fig.S 4** Schematic diagram of  $MAPbI_3/TiO_2$  heterojunction with different doping manners.

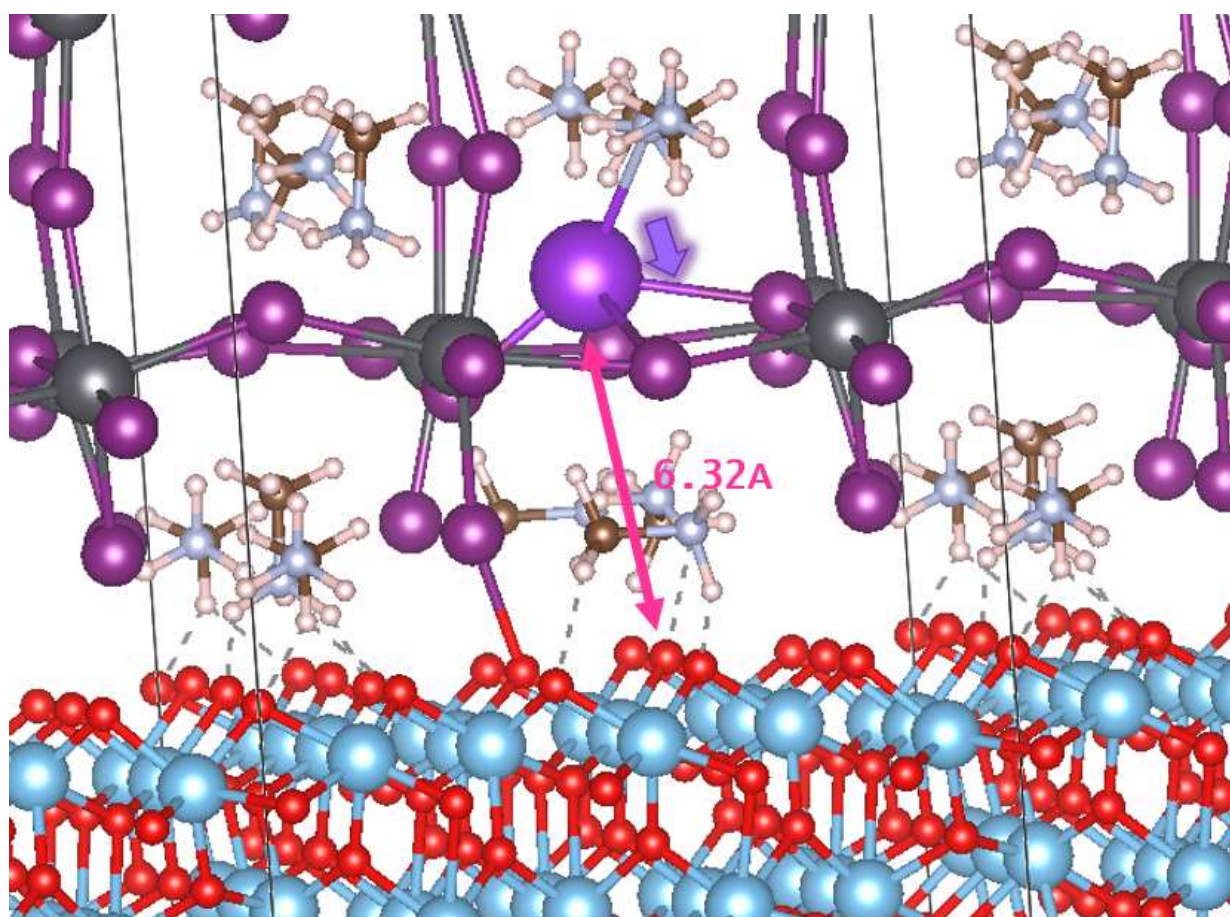

**Fig.S 5** Geometric structure for ID- $\text{K}^+$  set far from  $\text{MAPbI}_3/\text{TiO}_2$  junction. The purple arrow represents the direction of movement of  $\text{K}^+$  ions during the lattice relaxation.

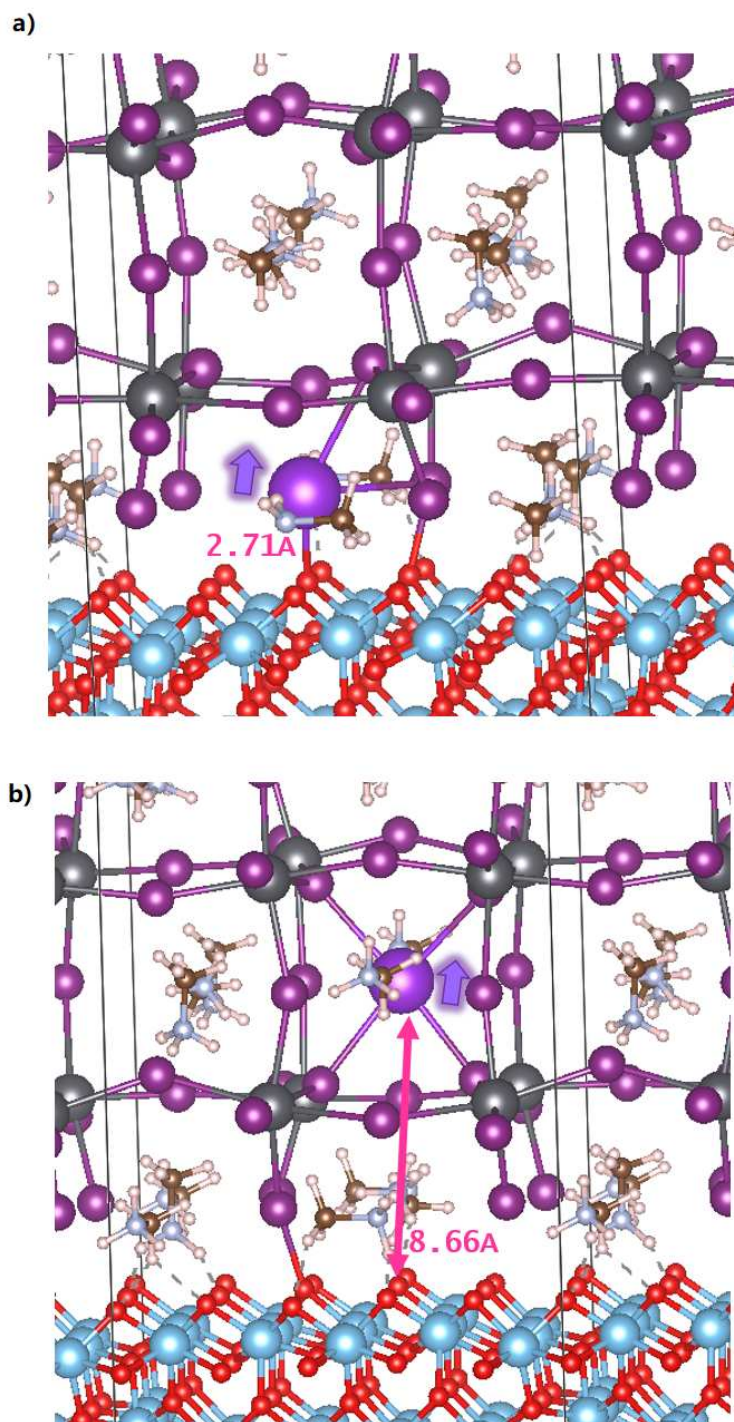

**Fig.S 6** Geometric structure for SD-K<sup>+</sup> *a)* near or *b)* far from the MAPbI<sub>3</sub>/TiO<sub>2</sub> junction.

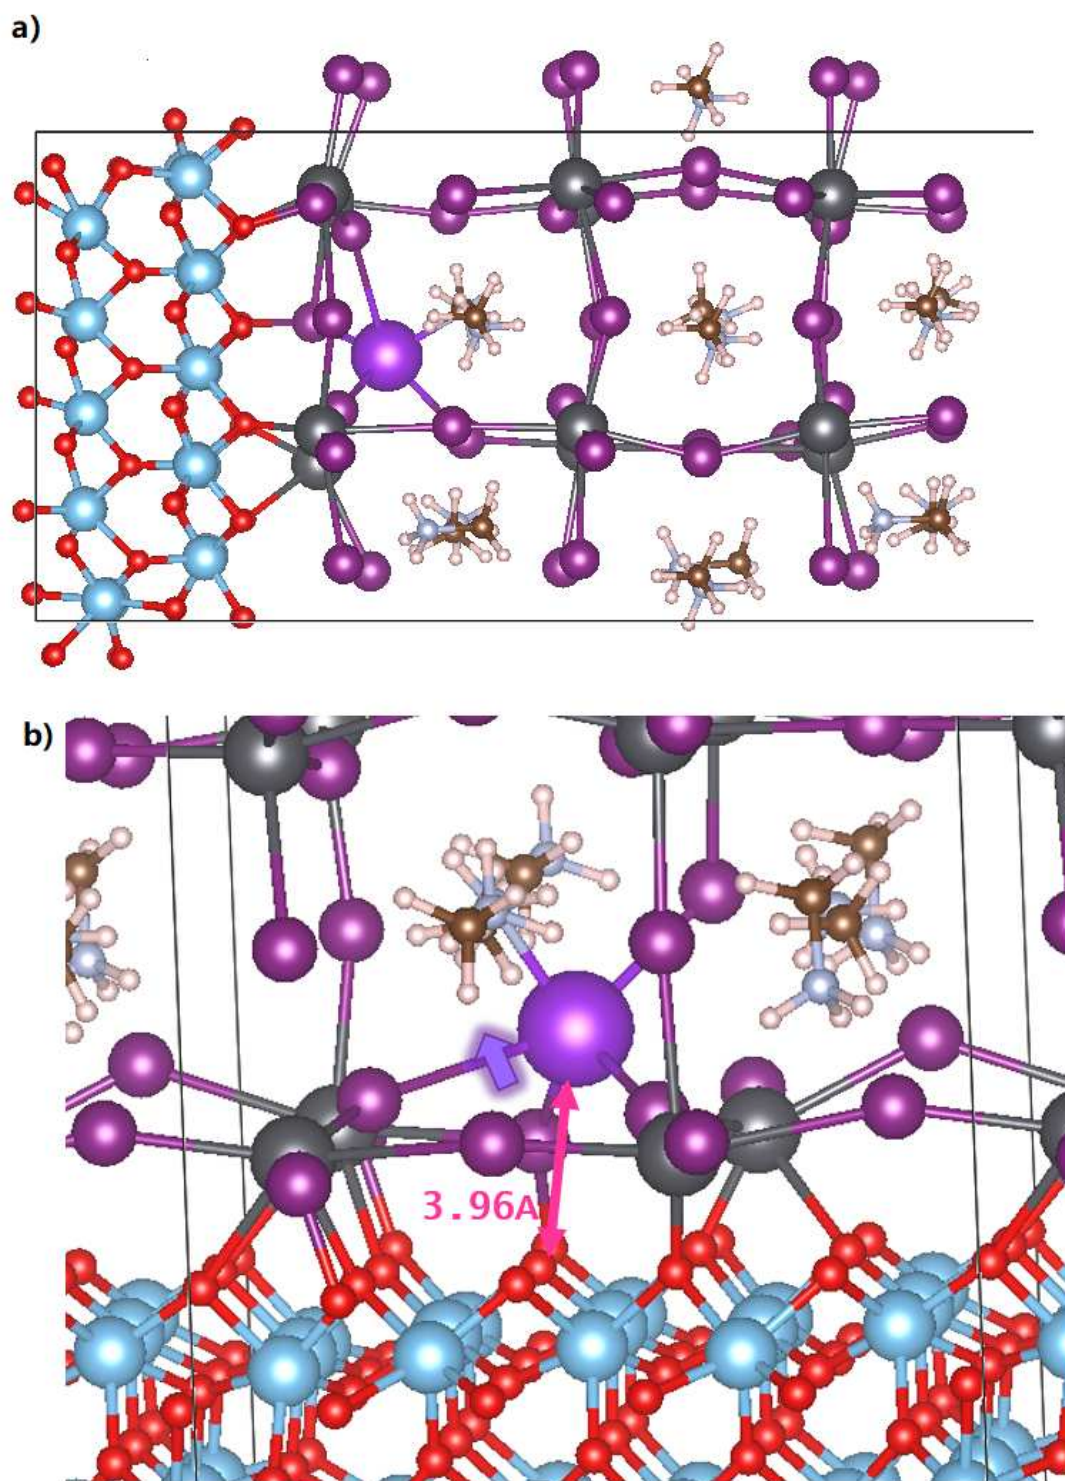

**Fig.S 7** Schematic diagram *a*) and optimized geometric structure *b*) of ID-K<sup>+</sup> in PbI<sub>2</sub>-terminated MAPbI<sub>3</sub>/TiO<sub>2</sub> junction.

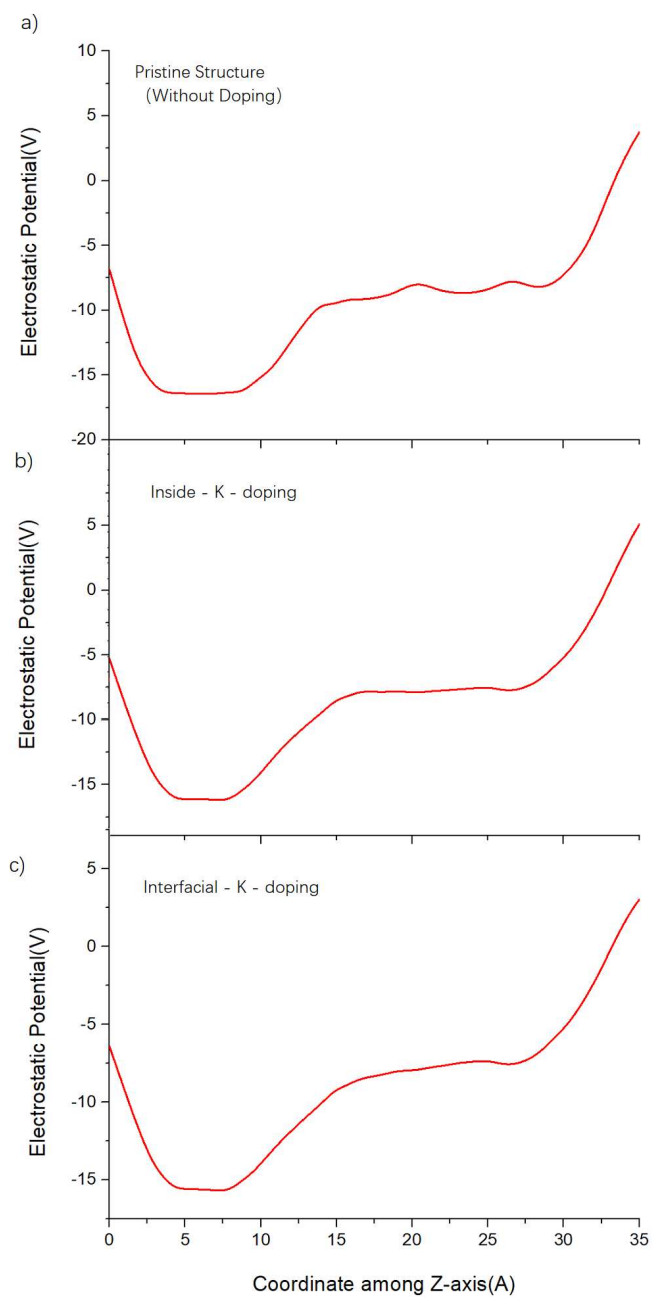

**Fig.S 8** Plane-average potentials of pristine and interstitially doped MAPbI<sub>3</sub>/TiO<sub>2</sub> heterojunction.

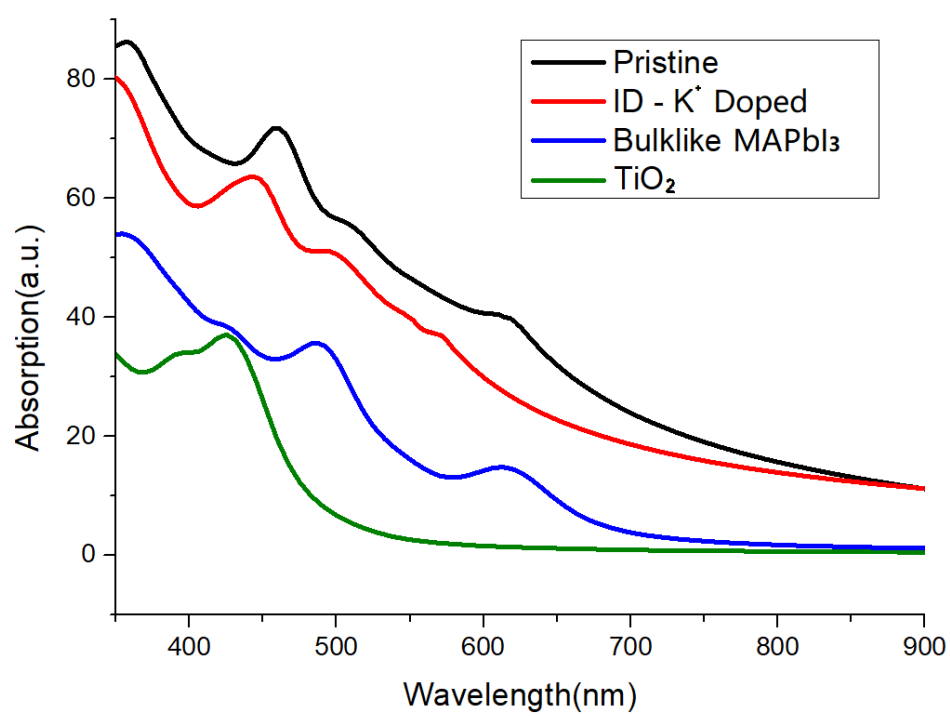

**Fig.S 9** Calculated absorption spectra of MAPbI<sub>3</sub>/TiO<sub>2</sub> junction with and without ID-K<sup>+</sup>. The bulk-like MAPbI<sub>3</sub> and anatase TiO<sub>2</sub> are shown for reference.

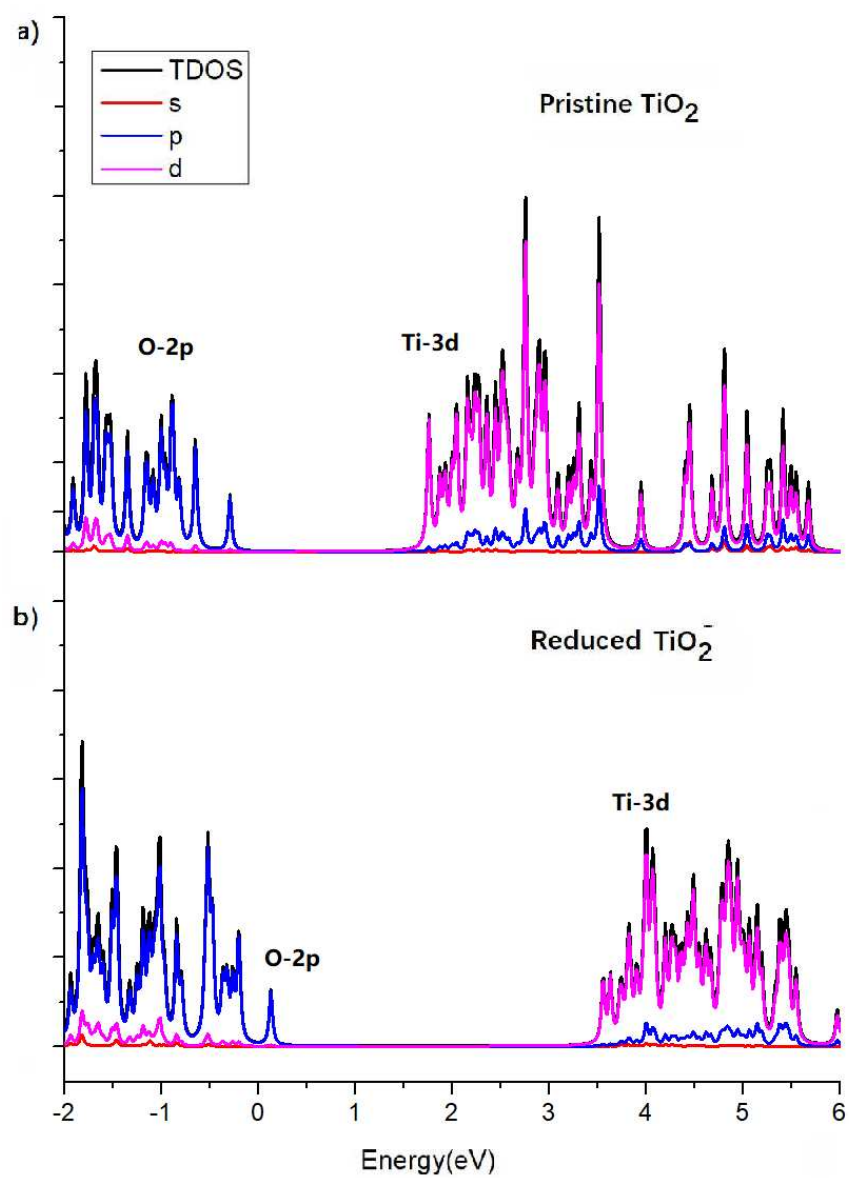

**Fig.S 10** pDOSs of a)pristine TiO<sub>2</sub> and b)trivalent TiO<sub>2</sub><sup>-</sup> by PBE+SOC.

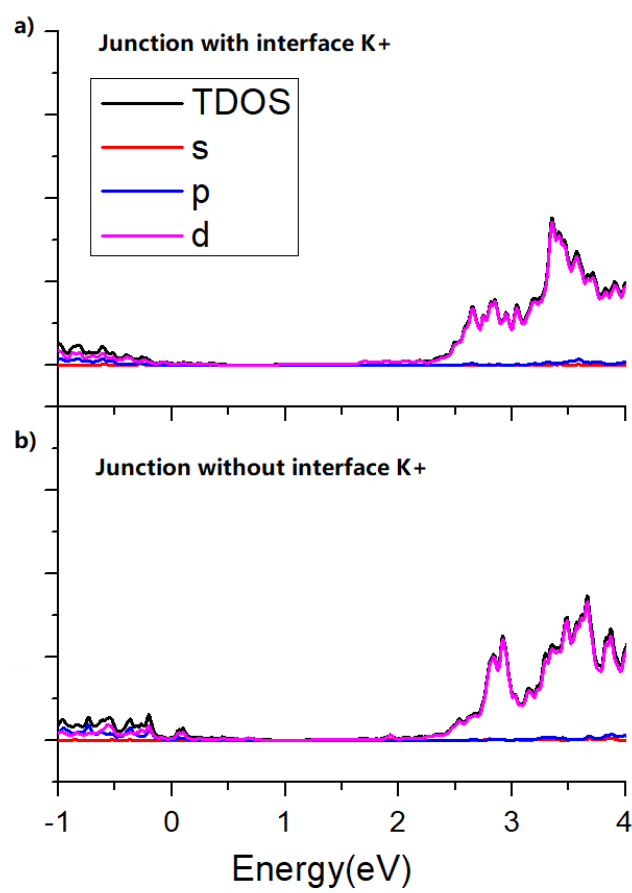

**Fig.S 11** pDOS for interfacial Ti cations with *a*) and without *b*) interfacial ID of  $K^+$  in  $PbI_2$ -terminated  $MAPbI_3/TiO_2$  junction in PBE+SOC.
